# Supplementary material for: Copper catalysed aerobic oxidation of benzylic alcohols in an imidazole containing N4 ligand framework
Source: Royal Society of Chemistry journal article supplement (doi:10.1039/c6dt03395d), 2016-01-01
Supplement: c6dt03395d1.pdf [file c6dt03395d1.pdf]

## Supplementary Information for:

### Copper catalysed aerobic oxidation of benzylic alcohols in an imidazole containing N<sub>4</sub> ligand framework

Rahul Jain,<sup>a</sup> Tony J. Gibson,<sup>a</sup> Mark S. Mashuta,<sup>a</sup> Robert M. Buchanan,<sup>a</sup> and Craig A. Grapperhaus<sup>\*a</sup>

<sup>a</sup>Department of Chemistry, University of Louisville, 2320 South Brook Street, Louisville, KY, USA 40292.

<sup>\*</sup>e-mail: grapperhaus@louisville.edu

## Contents

|                                                                                                                                                                              |    |
|------------------------------------------------------------------------------------------------------------------------------------------------------------------------------|----|
| Experimental method and Experimental Procedure for GC-MS analysis .....                                                                                                      | S2 |
| Figure S1. Gas Chromatogram of a reaction mixture.....                                                                                                                       | S2 |
| Figure S2. Electronic spectrum of [L <sub>3</sub> -Cu] <sup>2+</sup> with the successive additions of perchloric acid in acetonitrile.....                                   | S3 |
| Figure S3. FT-IR spectrum of [L <sub>3</sub> -Cu][(ClO <sub>4</sub> ) <sub>2</sub> ].....                                                                                    | S4 |
| Figure S4. Experimental and Simulated EPR spectrum of [L <sub>3</sub> -Cu][(ClO <sub>4</sub> ) <sub>2</sub> ] .....                                                          | S5 |
| Table 4. Selected hydrogen-bonding interactions in [L <sub>3</sub> -Cu][(ClO <sub>4</sub> ) <sub>2</sub> ] and [HL <sub>3</sub> -Cu][(ClO <sub>4</sub> ) <sub>3</sub> ]..... | S6 |

## Experimental Methods

IR spectra were measured with a Thermo Nicolet Avatar 360 spectrometer at  $4\text{ cm}^{-1}$  resolution. Electronic absorption spectra were obtained with an Agilent 8453 diode array spectrometer utilizing a custom designed cell with 1 cm path length quartz sample compartment. The GC-MS instrument was obtained from Agilent Technologies augmented with 7820A GC system and 5975 series MSD using Helium as a carrier gas at a flow rate of 1 mL/min. The oven temperature was set to  $100^{\circ}\text{C}$ . The column used was poly (5% diphenyl, 95% dimethylsiloxane) with length 30m,  $250\mu\text{m}$  inner diameter and  $0.25\mu\text{m}$  thickness.

## Experimental procedure

0.5 ml (5 mmol) benzyl alcohol was added to an empty vial containing a small stir bar. 10 ml acetonitrile was added to the vial. 127 mg (5 mol% of alcohol) of  $[\text{L}_3\text{-Cu}]^{2+}$  was added to the vial followed by 0.039 g TEMPO (5 mol % of alcohol) and 20  $\mu\text{L}$  NMI (5mol% of alcohol) was added. 0.08 M toluene was added to the solution as an internal standard. The reaction mixture which is blue in color was allowed to stir open to air for 4 hours. After 4 hours, 10  $\mu\text{L}$  of analyte was taken from now dark green reaction mixture and was diluted to 1.5 ml and was then subjected to GC-MS analysis to determine the yield and TON.

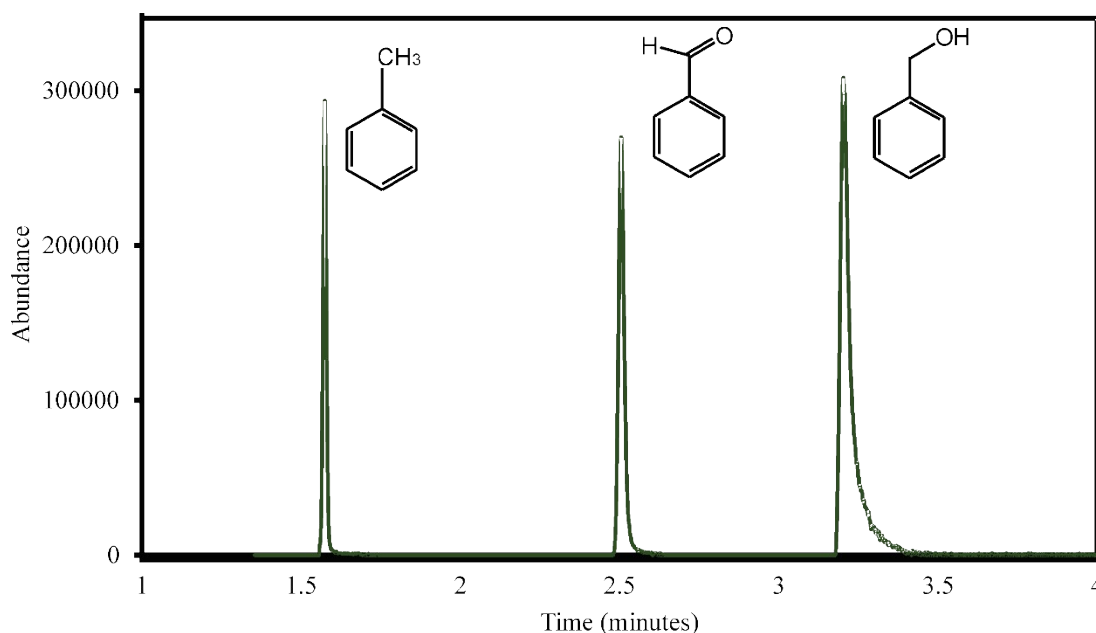

**Figure S1.** Gas Chromatogram of the reaction mixture showing toluene (internal standard), benzaldehyde (product) and benzyl alcohol (substrate).

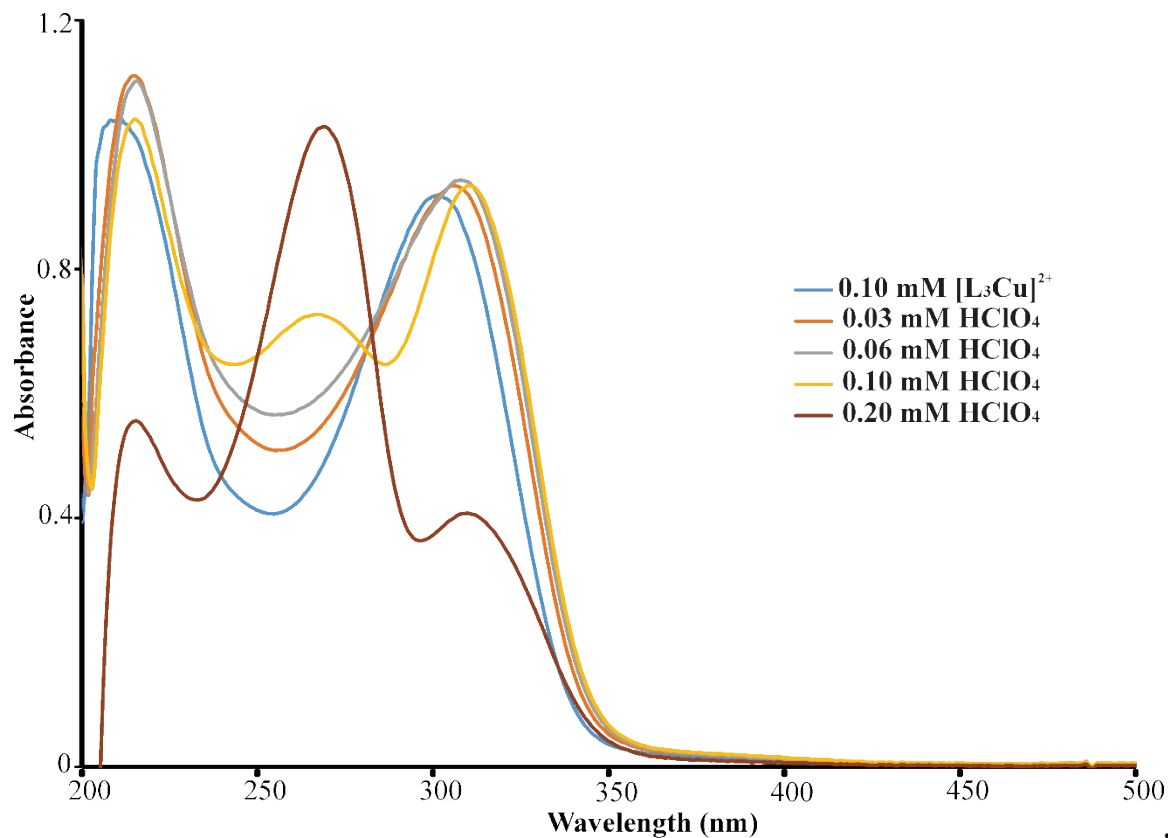

Figure S2. Electronic spectrum of  $[\text{L}_3\text{-Cu}]^{2+}$  with the successive additions of perchloric acid in acetonitrile

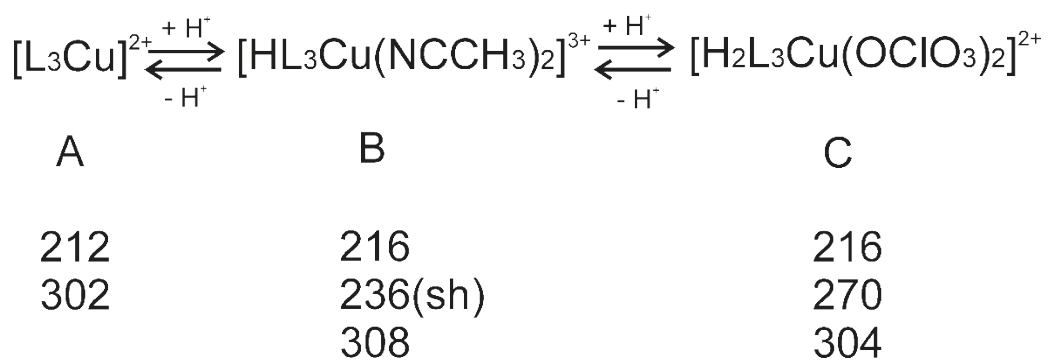

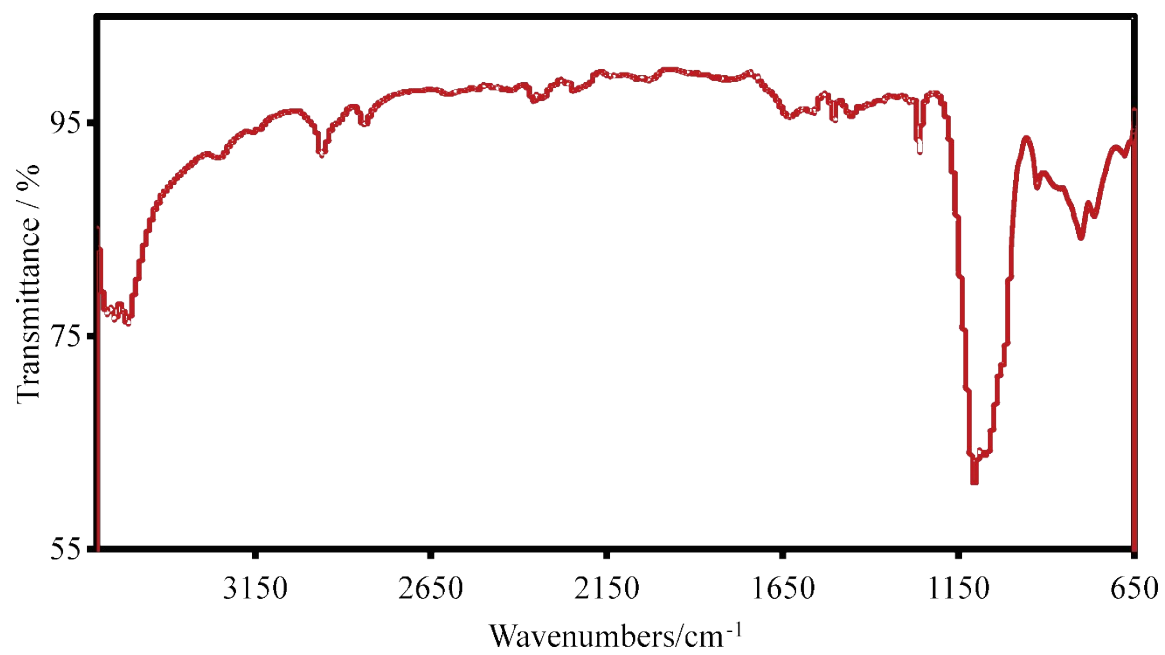

**Figure S3.** FT-IR of  $[L_3-Cu]([ClO_4]_2)$

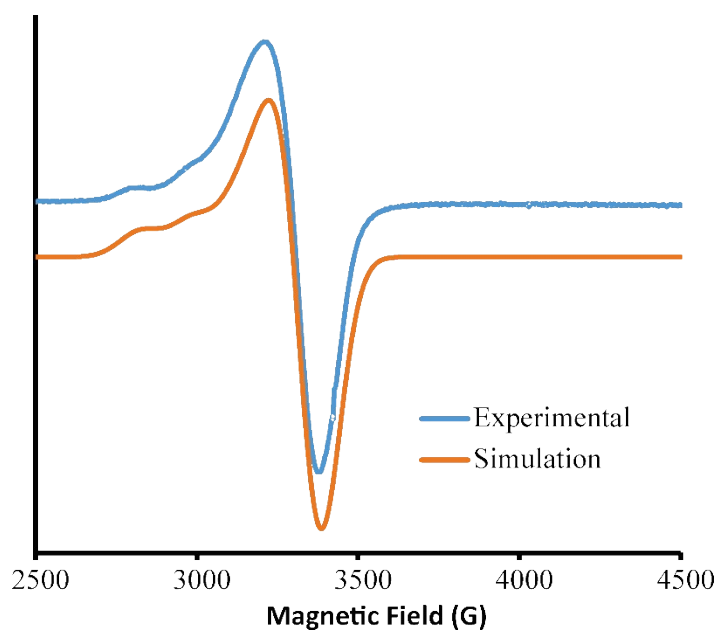

**Figure S4.** Experimental and simulated EPR spectra of  $[\text{L}_3\text{-Cu}][(\text{ClO}_4)_2]$  measured in  $\text{CH}_3\text{CN}$  frozen glass (77 K). Simulation parameters:  $g = 2.073$ ,  $g = 2.240$ ,  $A = 8.5$  MHz,  $A = 488.0$  MHz,  $\text{LW} = 15.28$  Hz.

**Table 4.** Selected hydrogen-bonding interactions in [L<sub>3</sub>-Cu][ClO<sub>4</sub>]<sub>2</sub> and [HL<sub>3</sub>-Cu][ClO<sub>4</sub>]<sub>3</sub>.

| D-H...A                                                 | D-H (Å) | H...A (Å) | D-H...A (°) | D...A (Å) |
|---------------------------------------------------------|---------|-----------|-------------|-----------|
| <b>[L<sub>3</sub>-Cu][ClO<sub>4</sub>]<sub>2</sub></b>  |         |           |             |           |
| N3-H3N...O6                                             | 1.00    | 2.30      | 159         | 3.248(4)  |
| N4-H4N...O1                                             | 0.99    | 2.20      | 118         | 2.811(3)  |
| <b>[HL<sub>3</sub>-Cu][ClO<sub>4</sub>]<sub>3</sub></b> |         |           |             |           |
| N3-H3N...O1                                             | 0.82(3) | 2.26(3)   | 156(2)      | 3.018(3)  |
| N4-H4N...O22                                            | 0.87(3) | 2.12(3)   | 173(2)      | 2.976(3)  |
